# Supplementary material
Source: PubMed Central journal article supplement (PMC3292058)
Supplement: NIHMS356969-supplement-Suppl__Fig__-1.pdf [file NIHMS356969-supplement-Suppl__Fig__-1.pdf]

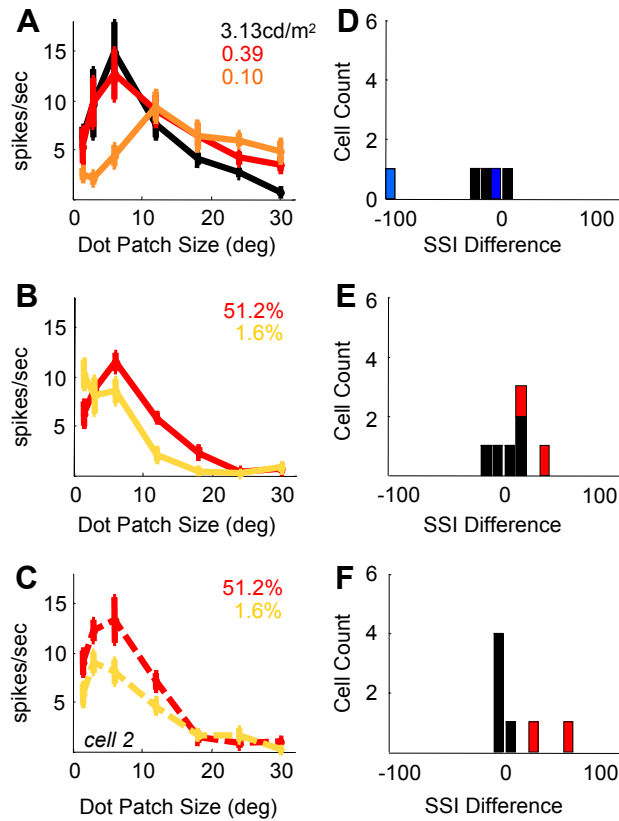

**Supplemental Fig. 1.** A-C: Size tuning of a single MT neuron varying contrast, limited lifetime dot coherence, and long lifetime dot coherence respectively. D-F: histograms of the change in suppression index for the population (n=7). Blue indicates significantly less suppression in the low condition. Red indicates significantly more suppression in the low condition. Black indicates no significance difference. There was no significant difference between the suppression index values in the two conditions ( $p = 0.34$ , paired t-test).
